# Supplementary material
Source: MDPI journal article supplement (https://www.mdpi.com/2073-4395/12/10/2343)
Supplement: s1 [file s1]

**Table S1:** Primers Sequences for qRT PCR.

| Name of Primers | Sequences |                       |
|-----------------|-----------|-----------------------|
| OsHKT1-F        | FP        | GGCCTTATGGCTTCCTTGGT  |
| OsHKT1-R        | RP        | GTACTAGAACAGCAGGGGCG  |
| OsHKT7-F        | FP        | TCTACATCGTGCTCGCCATC  |
| OsHKT7-R        | RP        | AGTTGGAGAACGTCGACACC  |
| OsHAK1-F        | FP        | CACCTGGTGTTTCATCCTGCT |
| OsHAK1-R        | RP        | GTCCAGCTCGTACCAGTAGC  |
| OsHAK5-F        | FP        | TCCACGAGTTCGTGTGATCC  |
| osHAK5-R        | RP        | ACCGTATGCATTGCCGATCT  |
| Actin-F         | FP        | TCCATCTTGGCATCTCTCAG  |
| Actin-R         | RP        | GTACCCGCATCAGGCATCTG  |
